# Supplementary material for: A genetically engineered Escherichia coli strain overexpressing the nitroreductase NfsB is capable of producing the herbicide D-DIBOA with 100% molar yield
Source: PubMed Central journal article supplement (PMC6526606; doi:10.1186/s12934-019-1135-8), 2019-05-20
Supplement: 12934_2019_1135_MOESM3_ESM.pdf [file 12934_2019_1135_MOESM3_ESM.pdf]

**Additional file 3.** List of the selected superpathways and genes involved in carbon and energy metabolism.

| <b>Superpathways<br/>(MultiFun Ontology:<br/>Metabolism, Child<br/>classes)</b> | <b>Subclasses (number of<br/>genes)</b>                | <b>Selected knock out mutant</b>                                                                                                                                                                                                                                                                   |
|---------------------------------------------------------------------------------|--------------------------------------------------------|----------------------------------------------------------------------------------------------------------------------------------------------------------------------------------------------------------------------------------------------------------------------------------------------------|
| Carbon utilization<br>(399)                                                     | Amines (38)<br>Amino acids (54)<br>Other compounds (1) |                                                                                                                                                                                                                                                                                                    |
|                                                                                 | Fatty acids (31)                                       | fadR (DNA-binding transcriptional dual regulator<br>FadR)                                                                                                                                                                                                                                          |
|                                                                                 | Carbon compounds (269)                                 | pfkA (6-phosphofructokinase I)<br>pfkB (6-phosphofructokinase II)                                                                                                                                                                                                                                  |
| Central intermediary<br>metabolism (278)                                        | Sugar nucleotide<br>biosynthesis, conversions<br>(12)  | sthA (soluble pyridine nucleotide<br>transhydrogenase)                                                                                                                                                                                                                                             |
| Energy metabolism,<br>carbón (203)                                              | Aerobic respiration (44)                               | nuoA (NADH:quinone oxidoreductase subunit A),<br>nuoB (NADH:quinone oxidoreductase subunit B),<br>nuoE (NADH:quinone oxidoreductase subunit E),<br>nuoF (NADH:quinone oxidoreductase subunit F),<br>nuoG (NADH:quinone oxidoreductase subunit G),<br>nuoN (NADH:quinone oxidoreductase subunit N), |
|                                                                                 | Glycolysis (13)                                        | pgi (glucose-6-phosphate isomerase),                                                                                                                                                                                                                                                               |
| Energy<br>production/transport<br>(96)                                          | Electron acceptors (31)                                | narG (nitrate reductase A subunit $\alpha$ )                                                                                                                                                                                                                                                       |
|                                                                                 | Electron carriers (15)<br>Electron donors (43)         |                                                                                                                                                                                                                                                                                                    |
