# Supplementary material for: A genetically engineered Escherichia coli strain overexpressing the nitroreductase NfsB is capable of producing the herbicide D-DIBOA with 100% molar yield
Source: PubMed Central journal article supplement (PMC6526606; doi:10.1186/s12934-019-1135-8), 2019-05-20

**Additional file 4.** Biotransformation yields in the biocatalysis carried out by  $\Delta lapA$ ,  $\Delta fliQ$ ,  $\Delta nuoG$  and  $\Delta fadR$  single mutant strains,  $\Delta lapA\Delta fliQ$  double mutant strain and wild type strain at 4, 8, 18 and 24 h of experiment after precursor addition.

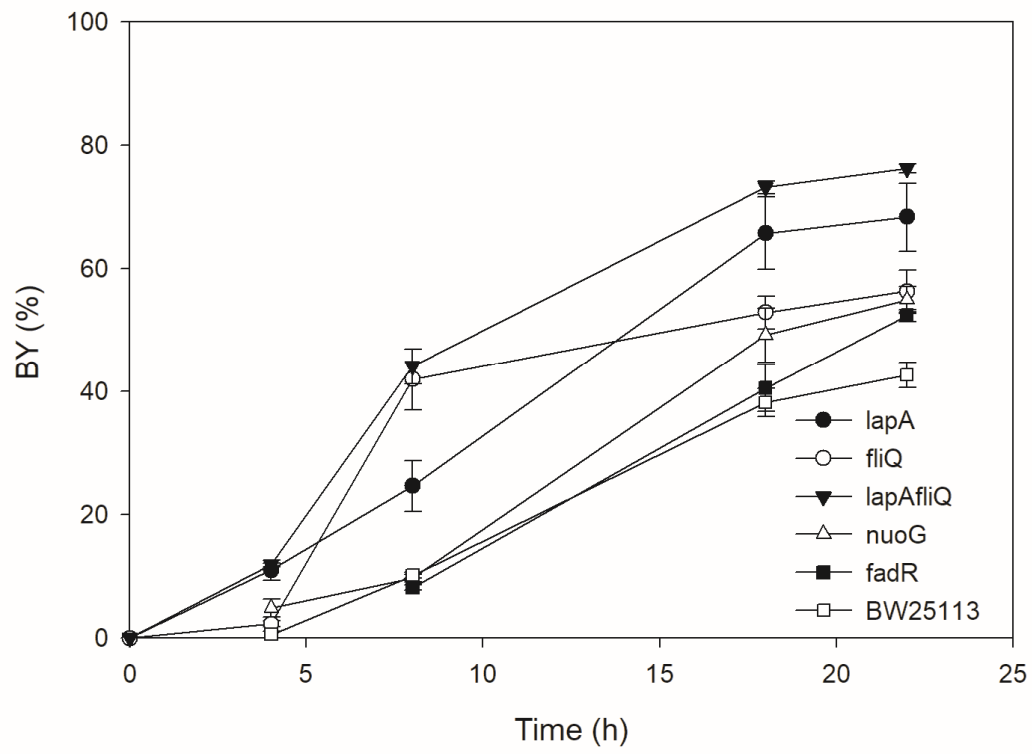

Supplement: 12934_2019_1135_MOESM4_ESM.pdf [file 12934_2019_1135_MOESM4_ESM.pdf]
