# Supplementary material for: A genetically engineered Escherichia coli strain overexpressing the nitroreductase NfsB is capable of producing the herbicide D-DIBOA with 100% molar yield
Source: PubMed Central journal article supplement (PMC6526606; doi:10.1186/s12934-019-1135-8), 2019-05-20

**Additional file 5.** Growth curves for: (a) Biotransformations with the  $\Delta lapA$ ,  $\Delta fliQ$  and  $\Delta lapA\Delta fliQ$  strains described in Fig. 3 c and d. (b) Biotransformation with the  $\Delta lapA\Delta fliQ$  double mutant in the multiple loads of precursor experiments described in Fig. 6

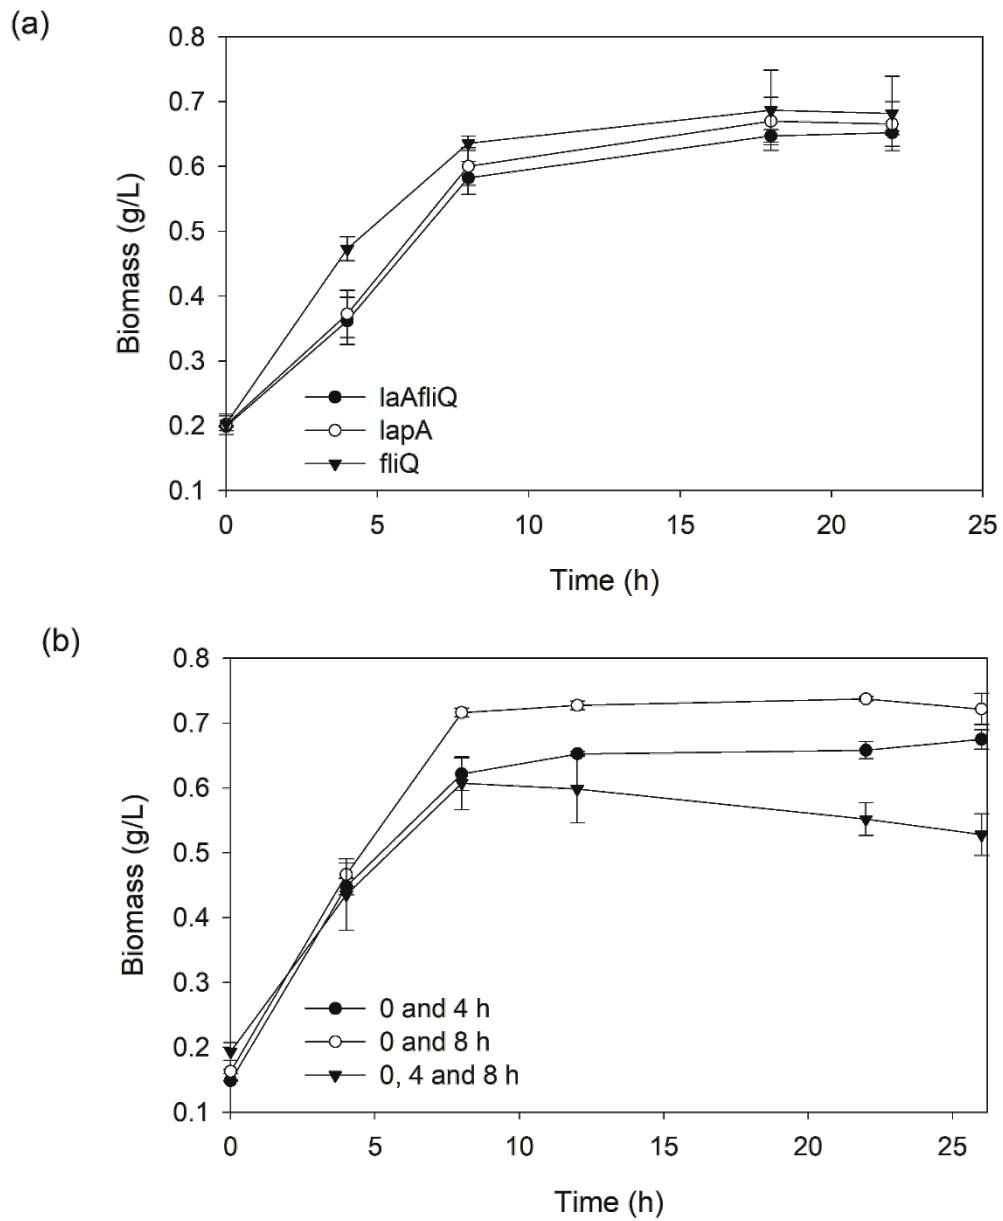

Supplement: 12934_2019_1135_MOESM5_ESM.pdf [file 12934_2019_1135_MOESM5_ESM.pdf]
